# 1 Insights from two decades of the Student Conference on Conservation 2 Science

3 **Authors:** Jonas Geldmann<sup>1</sup>, Helena Alves-Pinto<sup>2,3,1</sup>, Tatsuya Amano<sup>4,1,5</sup>, Harriet Bartlett<sup>1,6</sup>, Alec P.  
4 Christie<sup>1</sup>, Lydia Collas<sup>1</sup>, Sophia C. Cooke<sup>1</sup>, Roberto Correa<sup>1</sup>, Imogen Cripps<sup>1</sup>, Anya Doherty<sup>1</sup>, Tom  
5 Finch<sup>7</sup>, Emma E. Garnett<sup>1</sup>, Fangyuan Hua<sup>8,1</sup>, Julia Patricia Gordon Jones<sup>9</sup>, Tim Kasoar<sup>1</sup>, Douglas  
6 MacFarlane<sup>1,10</sup>, Philip A Martin<sup>1,11</sup>, Nibu Mukherjee<sup>1</sup>, Hannah S. Mumby<sup>1,12</sup>, Charlotte Payne<sup>1</sup>, Silviu  
7 O. Petrovan<sup>1</sup>, Ricardo Rocha<sup>1,13</sup>, Kirsten Russell<sup>1</sup>, Benno I. Simmons<sup>1,14</sup>, Hannah Wauchope<sup>1</sup>, Thomas  
8 A. Worthington<sup>1</sup>, Rosie Trevelyan<sup>15</sup>, Rhys Green<sup>1,7</sup>, and Andrew Balmford<sup>1</sup>

## 9 **Affiliations:**

- 10 <sup>1</sup> Conservation Science Group, Department of Zoology, University of Cambridge, Downing St., Cambridge  
11 CB2 3EJ, UK  
12 <sup>2</sup> Programa de Pós Graduação em Ecologia, Universidade Federal do Rio de Janeiro, CEP 21941-590 Rio de  
13 Janeiro, Brazil  
14 <sup>3</sup> Rio Conservation and Sustainability Science Centre, Department of Geography and the Environment,  
15 Pontificia Universidade Católica, Rio de Janeiro 22453-900, Brazil  
16 <sup>4</sup> School of Biological Sciences, University of Queensland, Brisbane, 4072 Queensland, Australia  
17 <sup>5</sup> Centre for the Study of Existential Risk, University of Cambridge, 16 Mill Lane, Cambridge, CB2 1SB, UK  
18 <sup>6</sup> Department of Veterinary Medicine, University of Cambridge, Madingley Road, Cambridge, CB3 0ES, UK  
19 <sup>7</sup> RSPB Centre for Conservation Science, RSPB, The Lodge, Sandy, SG19 2DL, United Kingdom  
20 <sup>8</sup> Institute of Ecology, Peking University, Haidian Road, Beijing 100871, China  
21 <sup>9</sup> College of Environmental Sciences and Engineering, Bangor University, LL57 2UW, UK  
22 <sup>10</sup> School of Psychological Science, Unverisity of Western Australia, 35 Stirling Hwy, Crawley WA 6009,  
23 Australia  
24 <sup>11</sup> BioRISC, St. Catharine's College, Cambridge CB2 1RL, UK.  
25 <sup>12</sup> School of Biological Sciences, Kadoorie Biological Sciences Building, University of Hong Kong, Pok Fu Lam  
26 Road, Hong Kong SAR  
27 <sup>13</sup> "CIBIO-InBIO, Research Centre in Biodiversity and Genetic Resources, University of Porto, Vairão, Portugal  
28 <sup>14</sup> Department of Animal and Plant Sciences, University of Sheffield, Western Bank, Sheffield, S10 2TN, United  
29 Kingdom  
30 <sup>15</sup> Tropical Biology Association, Cambridge, UK

## 31 **Abstract**

32 Conservation science is a crisis-oriented discipline focused on delivering robust answers to reducing  
33 human impacts on nature. To explore how the field might have changed during the past two decades,  
34 we analyzed 3,245 applications for oral presentations submitted to the Student Conference on  
35 Conservation Science (SCCS) in Cambridge, UK. SCCS has been running every year since 2000, aims  
36 for global representation by providing bursaries to early-career conservationists from lower-income  
37 countries, and has never had a thematic focus, beyond conservation in the broadest sense. We found  
38 that the majority of submissions to SCCS were based on primary biological data collection from local  
39 scale field studies in the tropics, contrary to established literature which highlights gaps in tropical  
40 research. Our results showed a small increase over time in submissions framed around how nature  
41 benefits people as well as a small increase in submissions integrating social science. Our findings also  
42 suggest that students and early-career conservationists could provide pathways to increased availability  
43 of data from the tropics and for addressing well-known biases in the published literature towards  
44 wealthier countries. We hope this research will motivate efforts to support student projects, ensuring  
45 data and results are published and made publicly available.

46 **Keywords:** Bias; Capacity building; Cross-disciplinarity; Early career; Field study; New conservation;  
47 Student

## 48 **1. Introduction**

49 Conservation science focuses on understanding and reducing the negative impacts of human activities  
50 on nature, and has, from its inception, been framed as a “mission-oriented discipline” (Soulé 1985). It  
51 has its origins in biology and, as a result, its initial emphasis was on describing and explaining the  
52 distribution of biodiversity as well as the ecological and evolutionary processes shaping the diversity  
53 of life under human pressure. However, over the last few decades it has become increasingly clear that  
54 better understanding biological processes alone is insufficient in identifying robust solutions to reduce  
55 pressures on nature and the environment (Balmford and Cowling 2006; Bennett et al. 2017; Kareiva  
56 and Marvier 2012; Meine et al. 2006). This has led to the integration of the social sciences, economics,  
57 and psychology to understand the role of people in addressing conservation problems (Mace 2014;  
58 Martin et al. 2012b; Teel et al. 2018) and an interest in the motivations for conserving nature (Greenwald  
59 et al. 2013; Kareiva 2014; Kareiva and Marvier 2012; Noss et al. 2013; Soule 2013).

60 Even though primary data are the foundation for conservation science and management (Tewksbury et  
61 al. 2014; Wilson 2017), the proportion of published studies based on primary data collection has  
62 decreased over the past two decades, though they still represent 70% of ecological studies (Ríos-Saldaña  
63 et al. 2018). In addition, the conservation literature continues to exhibit considerable geographical  
64 biases toward wealthier, often English-speaking countries (Amano and Sutherland 2013; Martin et al.  
65 2012a) and certain taxonomic groups (Clark and May 2002) and away from the tropics (Collen et al.  
66 2008; Mammides et al. 2016; Meijaard et al. 2015),. These biases limit our ability to assess what  
67 conservation actions work and where.

68 However, analysis of trends in peer-reviewed articles can give an unrepresentative picture of the work  
69 being done on the ground (Godet and Devictor 2018). Understanding the extent to which the peer-  
70 reviewed literature is missing specific types of studies or research from certain parts of the world can  
71 help to highlight publications gaps and improve the uptake of data and experiences outside the published  
72 literature sphere. One possible pathway to address the evidence gap and entrenched biases is to analyze  
73 conference submissions. While not without possible biases of their own, conference submissions may  
74 be less vulnerable to some of the issues in the peer-reviewed literature (e.g. positive-results publication  
75 bias, English language skills) and could therefore offer an additional view of what is happening on the  
76 ground, thus helping to identify the disconnect between on-the-ground research and the published  
77 literature with the aim to utilizing the full potential of the conservation research community.

78 In this study, we assessed the scope, data and methods of studies submitted for presentation at the  
79 Student Conference on Conservation Science (SCCS) in Cambridge, UK using a database of >3000  
80 applications compiled for this study. To our knowledge, SCCS is the oldest dedicated student  
81 conservation conference. Over the 20 years it has been running, it has welcomed applications from  
82 bachelor, masters and PhD students. It has never had a thematic focus but instead encourages  
83 submissions from across the diverse disciplines of conservation science. It has consistently received

84 applicants from around the world, in part thanks to its provision of bursaries to those from lower income  
85 countries. We classified these applications to explore patterns and trends over time in what conservation  
86 students study, focusing on potential changes in framing, the types of studies conducted, the methods  
87 used, and the integration of data and ideas from the social sciences. We were particularly interested in  
88 understanding if the transition from conservation as a predominantly biological science to a more multi-  
89 disciplinary one had changed the framing around the value of nature to people or the integration of the  
90 social sciences.

## 91 **2. Material and methods**

92 We included 3,487 submissions for oral presentations at SCCS covering 15 individual years spanning  
93 2002-2019. This represented the years for which we had all conference submissions, regardless of  
94 whether the applicant had subsequently been invited to present at the conference. Ethics approval was  
95 obtained through the Human Biology Research Ethics Committee, School of Biological Sciences,  
96 University of Cambridge (ref no.: PRE.2018.068). All submissions were anonymized, and e-mails were  
97 sent to all applicants asking them to reply if they did not want to be included in the study. This led to  
98 the removal of seven submissions.

99 The data extraction protocol and guidelines were developed prior to reviewing the submissions (Table  
100 S1). The protocol was pilot tested on a subset of submissions ( $n = 20$ ) by a sub-group of reviewers and  
101 subsequently revised based on these experiences. Two workshops were conducted prior to the data  
102 extraction to explain and discuss the final protocol. In total, 25 reviewers participated in the data  
103 extraction. The conference-submissions were assigned randomly among all 25 reviewers, with each  
104 reviewer extracting data from approximately 140 abstracts. The year of submission was removed to  
105 avoid biasing the data extraction.

### 106 **2.1 Data extraction**

107 For each submission (title and abstract), the reviewers extracted information on the applicant  
108 (nationality, country of residence, career stage) as well as on 25 elements pertaining to the research  
109 carried out by the student. The abstracts for 2002, 2003, and 2006 consisted of a title and an abstract  
110 with no formatting requirements. For subsequent years the abstract was divided into four parts: 1) What  
111 conservation problem or question does your talk address?, 2) What were the main research methods  
112 you used?, 3) What are your most important results?, and 4) What is the relevance of your results to  
113 conservation?. The 25 elements covered research locations (e.g. country, region); study type (i.e. field,  
114 laboratory, modelling, remote sensing); and scale of study (e.g. local, national, multi-country) (see  
115 Table S1 for the full list and definitions). Where possible, answers were assigned to predefined  
116 categories (e.g. realm of study: terrestrial, marine, freshwater, coastal, or multiple). In addition,  
117 reviewers used 'not sure' where the abstract did not allow a clear interpretation or 'not applicable'  
118 where the particular questions were not relevant.

119 Where one or multiple species were studied, we recorded the broad taxon using 16 categories: algae,  
120 lichens, plants, fungi, arthropods, marine invertebrates, other invertebrates, fish, amphibians, reptiles,  
121 birds, mammals, other, multiple, not applicable, and not sure.

122 For each conference submission each reviewer assessed whether the study primarily addressed  
123 ‘Pressure’, ‘State’, or ‘Response’ following the PSR-framework of the Organisation for Economic Co-  
124 operation and Development (1993). For example, a study could examine the effect of protected areas  
125 (response) in reducing hunting (pressure) on numbers of lions (state). This was done based on an  
126 interpretation of the entire abstract. Where more than one category could apply, we used a hierarchical  
127 approach to assign a single category to each submission, where ‘response’ superseded ‘pressure’ which  
128 superseded ‘state’ - so the example above would be classed as a response study. The hierarchical  
129 approach was used to reflect the conceptual thinking behind the PSR-framework, that conservation is  
130 the human response to human pressures affecting the natural state of the world.

131 We extracted information on how far human dimensions were included in the studies through two  
132 questions. The first addressed whether the submission mentioned conservation benefiting people and/or  
133 the importance of involving people in conservation decisions. It was not necessary for the study to be  
134 primarily framed around the value of nature to people, only that the role of, or relevance to, people was  
135 articulated. The second addressed whether the primary focus of the study was the value nature provides  
136 to people.

137 We assessed whether submissions recorded biological data (e.g. species, habitats, genetics or any other  
138 data derived from a biological system) and/or socio-economic data (e.g. livelihood issues,  
139 economy/finances, attitudes, human behavior, or human behavior change). Additionally, we recorded  
140 if any data was collected by the students themselves as well as if there was any not collected by the  
141 student.

142 Finally, we recorded the methods for both biological (e.g. transects, camera-traps, remote sensing,  
143 interviews) and socio-economic data collection (e.g. interviews, questionnaires). For biological  
144 methods the original 20 categories (Table S1) were reduced to six: 1) field data, 2) genetic data, 3)  
145 internet/literature search, 4) audio and camera recordings, 5) remote sensing, and 6) other.

146 Following data extraction, 359 (11.1%) submissions were selected for kappa analysis to test the inter-  
147 reviewer variability in data extraction. This was done by randomly selecting 10% of the conference-  
148 submissions of each reviewer to be re-reviewed by a different randomly selected reviewer. For the years  
149 2002 and 2003 we assessed 20% of each year following the same procedure. Kappa analysis was  
150 conducted on all questions individually and on overall agreement. Based on this, questions with a  
151 Cohen’s kappa score below 0.6 (weak agreement) were not included in the analysis (McHugh 2012).  
152 The average Cohen’s kappa for all included questions was 0.78 (S.E. = 0.07, min = 0.64, max = 0.87,  
153 Table S2). Only the identification of main threat (Cohen’s kappa = 0.21) did not meet this criterion.

154 The years 2002 and 2003 were assessed separately leading to the exclusion of the Pressure-State-  
155 Response questions for those years (Cohen's  $\kappa = 0.40$ ).

## 156 2.2 Analysis

157 Prior to calculations of proportions, all empty fields, 'not applicable', and 'not sure' were removed.  
158 Thus, the number of responses for each year varies across analyses. For questions where we assessed  
159 proportional changes over time, we used beta-regression, suitable for proportions, to model the  
160 proportion as the dependent variable and year as a continuous independent variable. All analyses were  
161 carried out in R 3.5.1 (R Development Core Team 2019).

## 162 3. Results

### 163 3.1 Geographical and taxonomic focus

164 We assessed 3,245 submissions after removing 235 that had been submitted but did not contain an  
165 abstract and/or title. Over the 18-year period, the conference received applications from 128 countries;  
166 the majority of applicants were from India ( $n = 454$ ), United Kingdom ( $n = 312$ ), Kenya ( $n = 125$ ),  
167 Nigeria ( $n = 121$ ), or Nepal ( $n = 100$ ). By region, Asia was the largest source of applicants ( $n = 992$ ),  
168 followed by Africa ( $n = 961$ ), Europe ( $n = 598$ ) and Latin America ( $n = 213$ ) (Table 1).

169 **Table 1.** Proportion of abstracts across the six regions

| Region        | Nationality | Residence | Fieldwork   | % studies based on own fieldwork | % people focused |
|---------------|-------------|-----------|-------------|----------------------------------|------------------|
| Africa        | 961 (34%)   | 958 (33%) | 1,016 (41%) | 82%                              | 36%              |
| Asia          | 992 (33%)   | 921 (34%) | 949 (39%)   | 83%                              | 26%              |
| Europe        | 598 (21%)   | 846 (21%) | 216 (9%)    | 73%                              | 27%              |
| Latin America | 213 (7%)    | 166 (7%)  | 222 (9%)    | 70%                              | 32%              |
| North America | 86 (3%)     | 115 (3%)  | 16 (<1%)    | 66%                              | 49%              |
| Oceania       | 41 (1%)     | 55 (1%)   | 38 (2%)     | 51%                              | 17%              |

170 Nationality, residence and fieldwork shows the percentage of submissions (after removing those that noted not  
171 applicable and not sure) from each region. % fieldwork and % people-focused shows the percentage of  
172 submissions, within each region that included fieldwork and a focus on people related values respectively. For the  
173 last two columns, submissions were assigned a region based on the nationality of the applicant. Because of  
174 different degrees of missing data in individual questions, the sums across columns are not the same.

175 Noticeably there were very few submissions from North America ( $n = 86$ ) and Oceania ( $n = 41$ ). No  
176 changes were observed over time in the proportion of applicants from different regions (Fig. S1) and  
177 only few, and minor, at the country level (Fig. S2). In terms of country where the study took place, India  
178 featured the most ( $n = 435$ ), followed by South Africa ( $n = 114$ ), Kenya ( $n = 110$ ), Nepal ( $n = 101$ ), and  
179 Madagascar ( $n = 97$ ). Many applicants from Europe and North America worked outside their own  
180 region, which was much less the case with students from other regions (Fig. 1). The vast majority of  
181 studies were terrestrial ( $n = 2,393$ ) followed by freshwater ( $n = 225$ ), marine ( $n = 177$ ), multiple ( $n =$   
182  $119$ ) and coastal ( $n = 102$ ). Across taxonomic groups, mammals were the most studied ( $n = 875$ ),  
183 followed by plants ( $n = 470$ ), birds ( $n = 432$ ), fish ( $n = 121$ ) and arthropods ( $n = 89$ ), while potentially-  
184 important indicator groups, such as amphibians ( $n = 58$ ), fungi ( $n = 10$ ), and lichens ( $n = 2$ ), were far  
185 less represented (Fig. 2).

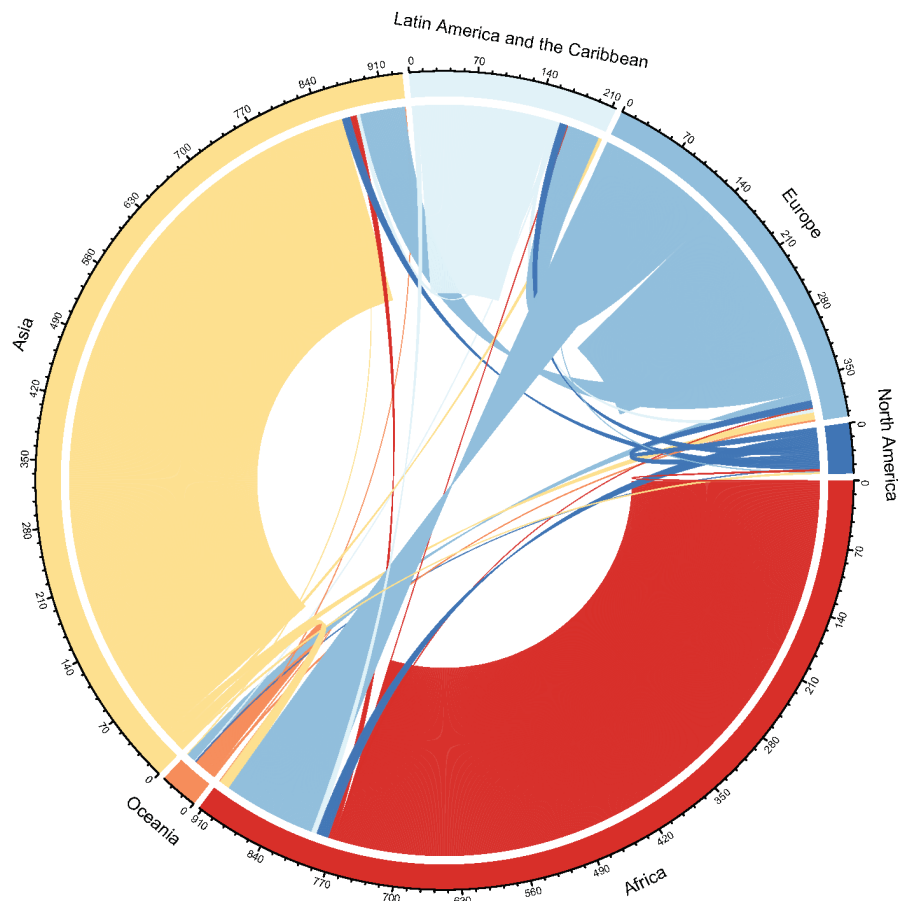

186  
187 **Figure 1.** Diagram showing the number of SCCS applicants conducting fieldwork in different regions (the outer  
188 ring). The color of the inner (thicker) ring indicates the nationality, grouped by region, of the person conducting  
189 the research. The figure shows that there are more Europeans working in Africa, Asia, and Latin America and the  
190 Caribbean than there are people from those regions working in Europe.

### 191 **3.2 Framing**

192 On average, 38% ( $n = 1,003$ ) of studies focused on the state of nature, investigating patterns of  
193 biodiversity and processes, followed by 36% ( $n = 954$ ) addressing pressure to biodiversity, and 26% ( $n$   
194  $= 671$ ) addressing responses. No changes were observed between 2007 and 2019 in the proportions of  
195 state, pressure and response studies (Fig. 3a).

196 Of all the submissions, 31.3% ( $n = 983$ ) mentioned the importance of conservation benefiting people  
197 and/or the importance of involving people in conservation decisions, with no change observed over  
198 time. While remaining relatively low, in absolute terms (mean = 11.8%) the number of submissions  
199 with a primary focus on the value of nature to people increased significantly ( $z$ -value = 2.62,  $p = 0.009$ ,  
200  $DF = 13$ ) almost doubling from 2002 (estimate = 7.0%) to 2019 (estimate = 16.5%; Fig. 3b).

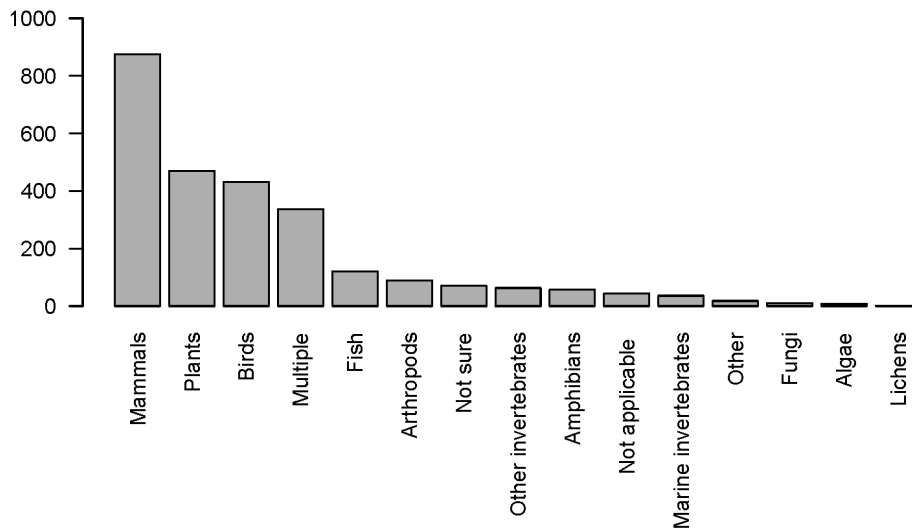

**Figure 2.** Taxonomic coverage across 2,489 conference submissions (excluding submissions with an ambiguous or no study taxon). Reviewers were explicitly asked to select the main species or higher taxonomic unit of interest. Where other species were described but were not the focus of the study, they have not been recorded.

### 201 3.3 Data and methods

202 Most submissions (80%,  $n = 2,442$ ) contained biological data, while data on socio-economic aspects  
 203 were less common (33%,  $n = 998$ ). Only 15% ( $n = 454$ ) contained both biological and socio-economic  
 204 data. For biological data and the combination of biological and socio-economic data, the proportions  
 205 showed no change over time. However, the proportion of submissions including socio-economic data  
 206 increased over time (estimate = 0.03, S.E = 0.01,  $p = 0.004$ , DF = 13; Fig. 3c).

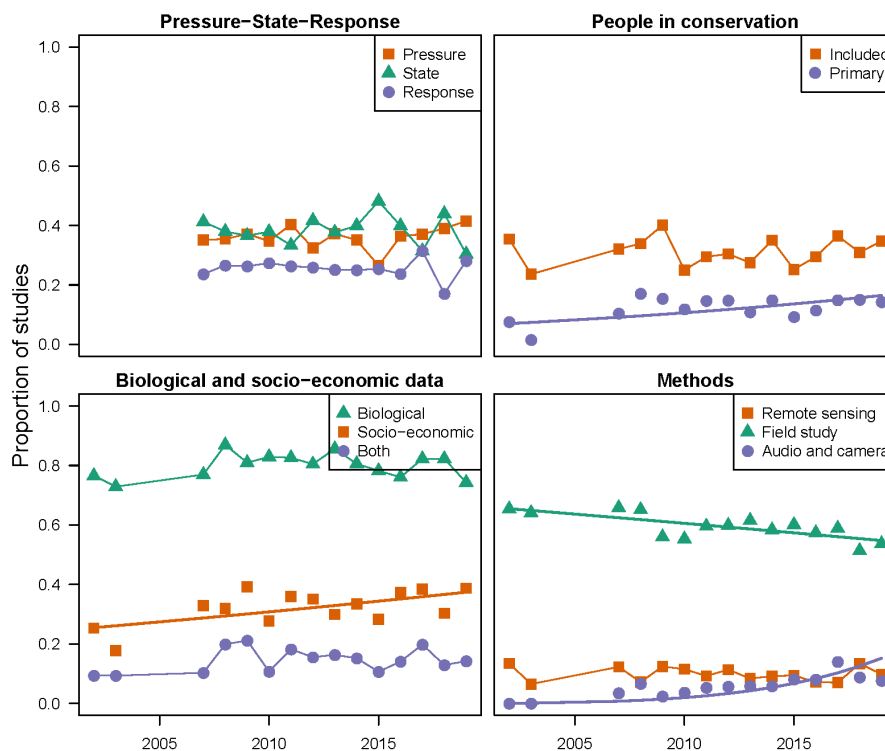

207

208 **Figure 3.** Change over time in the proportions of (a) studies that looked at pressure-state-responses, (b) studies  
 209 that mentioned the importance of conservation to benefiting people and/or the importance of involving people in  
 210 conservation decisions, or studies whose primary focus was to understand the values that nature provides to  
 211 people, (c) studies that including biological data or socio-economic data, or both, and (d) studies using different  
 212 methods. Studies that noted 'Not applicable', 'Not sure' or did not provide an answer for the questions involved  
 213 were not included. Dots are connected where not significant relationship ( $p \geq 0.05$ ) was identified while a  
 214 regression line represents that a significant relationship ( $p < 0.05$ ) was identified

215 Most of the data, both biological (66%,  $n = 2,001$ ) and socio-economic 75% ( $n = 852$ ), were collected  
216 by the students themselves. Eighty percent ( $n = 2,457$ ) of the submissions contained a field-collection  
217 element (Table 1) with 74% ( $n = 2,090$ ) of the submissions covering local-scale studies that looked at  
218 one or a few sites, and only 17% ( $n = 475$ ) of studies investigating patterns at national level, 7% ( $n =$   
219 186) looking at multiple countries, and 2% ( $n = 66$ ) conducting global analyses.

220 The methods used to collect biological data remained relatively constant over time and were dominated  
221 by field-based approaches, such as transects, plots and trapping (58.4%,  $n = 1,691$ ). A decrease (from  
222 65.5% in 2002 to 54.8% in 2019) was observed in the use of traditional field-based methods (estimate  
223 = -0.026, S.E = 0.006,  $p < 0.001$ , DF = 13), and there was an increase (from 0% in 2002 to 15.2% in  
224 2019) in the use of audio and camera recordings (estimate = 0.21, S.E = 0.041,  $p < 0.001$ , DF = 13),  
225 suggesting a change in approach toward more automated methods, rather than a change away from  
226 field-based data-collection (Fig. 3d).

#### 227 **4. Discussion**

228 Our results show that the majority of submissions to SCCS were based on primary data collection of  
229 biological data from local-scale field studies. These findings suggest a different trend to the concerns  
230 raised in previous papers: that there is a decrease in the proportion of field-based studies in the peer-  
231 reviewed literature (Carmel et al. 2013; Ríos-Saldaña et al. 2018). Likewise, contrary to the  
232 preponderance of researchers from wealthier countries found by reviews of published papers (Amano  
233 and Sutherland 2013; Mammides et al. 2016; Martin et al. 2012a), the majority of submissions to SCCS  
234 were from Asian and African nationals. These two continents were even more prominent when looking  
235 at the countries in which people collected data (Fig 1). For example, citizens from the UK represented  
236 the second largest group of applicants, but the UK ranked 15th as a location for fieldwork. The  
237 discrepancy, in terms of type and location of studies, between the published literature and submissions  
238 to SCCS, highlights a potential barrier in the pathway from fieldwork to publication that warrants  
239 further exploration. Furthermore, it suggests that the identified knowledge and data gaps for the tropics,  
240 in the published literature (Collen et al. 2008; Mammides et al. 2016; Meijaard et al. 2015), may not  
241 only be driven by the lack of research effort and data-collection but also by publication bias. This is of  
242 particular concern given many areas in the tropics are of significant biodiversity importance (Brooks et  
243 al. 2006; Myers et al. 2000).

244 There is a need to improve the uptake of studies from the tropics in the peer-reviewed literature to  
245 ensure the availability of knowledge and data in conservation research and efforts. This will not only  
246 directly benefit the conservation community but will also help ensure a greater diversity in the people  
247 and views represented within conservation science. To achieve such improvements, it will be important  
248 to support the data-collection-publication pipeline in areas currently underrepresented in the published  
249 literature. This may include reduced or waived publication fees (already applied by some journals), as  
250 well as language support for non-native English speakers, which is a major barrier in the publication



251 process (Amano et al. 2016). There might also a need for capacity building (Legg and Nagy 2006) and  
252 to assist people in scientific writing. For example, in a capacity-building program in Africa run by the  
253 Tropical Biological Association, a focus on how to write scientific articles resulted in 87 publications  
254 (*Pers obs.* R. Trevelyan). Additionally, while the peer-review process is foundational for the publication  
255 of scientific studies, it is not the only way to publish data. An increasing number of preprint services  
256 and online data repositories allow for data sharing outside the traditional publication pathway. Similar  
257 to the role of GenBank (NCBI Resource Coordinators 2017) in molecular biology, such databases might  
258 help to publicize data currently unavailable in the public sphere. However, to be successful, this should  
259 be linked to transparent standards (Poisot et al. 2019), formalized method of citing the data-collectors,  
260 and must be accompanied by the development of appropriate and fair crediting mechanisms for data  
261 collectors by institutions and funding bodies. Additionally, data can represent value, both monetary and  
262 cultural, thus where fieldwork is taking place outside the country of the institution the access to data  
263 should be accompanied by benefit-sharing (Baker et al. 2019).

264 Over the 18-year span of the conferences for which we had data, the number of submissions that  
265 focused on the value that nature provides to people increased. This corresponds with the emergence  
266 within the conservation community of a ‘nature for people’ framing (Mace 2014), which has profoundly  
267 influenced the strategies of some of the world’s largest conservation organizations (e.g. Conservation  
268 International and The Nature Conservancy; Kareiva et al. 2014). However, this narrative has been  
269 criticized as western-dominated (Tallis and Lubchenco 2014) and as describing a polarization not  
270 actually found in the conservation community (Sandbrook et al. 2019). In this light, it is interesting that  
271 while we observed a significant trend over time, the proportion of SCCS submissions focused on the  
272 services and goods that nature provides to people remained low. Thus, our results suggest that while  
273 the emphasis on people is a component in conservation, it is by no means dominant. It is possible that  
274 our sample, with a majority from lower-income countries, might be less influenced by this trend in  
275 conservation than in higher-income regions. North America and Australia which are among the largest  
276 contributors to peer-reviewed journal articles in conservation science are for example almost entirely  
277 absent in our sample while also among the strongest proponents of a more people focused conservation  
278 narrative (Tallis and Lubchenco 2014).

279 The applications we assessed support suggestions that conservation science is broadening (Teel et al.  
280 2018) by revealing an increase over time in the use socio-economic data. However, the proportion  
281 remained relatively low across the 18 years. Additionally, the number of studies integrating both  
282 biological and socio-economic data did not increase, with only around 16% of studies combining  
283 biological and socio-economic data in the same study. This suggests that while conservation has become  
284 increasingly multi-disciplinary, there is still considerable scope for further integration (also see  
285 Guerrero et al. 2018). The call for integrating socio-economic perspectives into conservation research  
286 is not new (e.g. Adams and McShane 1992), and it is increasingly recognized that both biological and

287 socio-economic perspectives are vital to conservation success (Martin et al. 2016). The continued  
288 paucity of socio-economic considerations in conservation science we observed highlights the need to  
289 broaden the training of future conservation researchers. This requires university departments and  
290 faculties to foster integration and to break down silos between disciplines and departments.

291 The majority of studies focused on describing biological states or human pressures while only 26%  
292 evaluated conservation interventions and solutions. Our results therefore mirror several papers that  
293 highlight the lack of studies assessing the impact of conservation responses (Geldmann et al. 2013;  
294 Schleicher 2018). While we recognize that an understanding and description of the state of nature and  
295 the pressures it faces provides a foundation for developing effective responses, the under-representation  
296 of studies assessing the impact of conservation efforts is concerning, given longstanding calls for  
297 increasing evidence on the effectiveness of conservation interventions (Pullin and Knight 2001;  
298 Sutherland et al. 2004). Assessing the impact of conservation responses is fundamental to improving  
299 their effectiveness (Balakrishna 1999; Ferraro 2009) as well as measuring progress towards achieving  
300 policy targets (Fisher et al. 2014). It is possible that the complexity of assessing conservation impact  
301 (Baylis et al. 2016) is limiting the number of such studies undertaken by students, who are often  
302 constrained by time and may lack the experience required to undertake complex impact assessments.  
303 However, it is vital that conservation science increasingly addresses this knowledge gap (Baylis et al.  
304 2016; Miteva et al. 2012; Schleicher 2018) to better understand what works, when and why.

305 By following 18 years of submissions from the oldest student conservation conference, our study  
306 provides a unique temporal insight into the work undertaken by successive cohorts and early-career  
307 conservation scientists. In including all submissions to give a talk, our sample is not biased by the  
308 quality of submissions or by temporal shifts in the preferences of the selection committees but represents  
309 the full diversity of students applying for SCCS. Nevertheless, our sample might not represent the wider  
310 community as self-selection might exclude some from submitting. As with published studies (Amano  
311 et al. 2016; Amano and Sutherland 2013), countries (often former British colonies) where it is more  
312 common to communicate in English were disproportionately represented and so the conference  
313 doubtless does not fully capture a representative sample of all conservation studies. Moreover, the low  
314 proportion of marine studies indicates that SCCS has tended to attract a lower proportion of those  
315 working on marine conservation, perhaps due to the organizers having mostly terrestrial experience and  
316 networks. Likewise, the dominance of field studies from the tropics in the conference submissions might  
317 not reflect a dominance of field studies in general. Rather, it is possible that fieldwork in temperate  
318 zones is framed more as ecological research without a conservation focus. Nevertheless, our study  
319 suggests that there is an untapped resource in field studies and perhaps more tropical research being  
320 undertaken by students from tropical countries than is suggested by the published literature.

## 321 5. Conclusion

322 Based on our findings we see an urgent need to make data generated by tropical fieldworkers more  
323 widely available, and for increased efforts in examining the impact of conservation interventions. Any  
324 approach should ensure the quality of the data as well as equitable access that respects, acknowledges,  
325 and includes the data providers. Our results also highlight the need for further integration of disciplines  
326 outside biology. Only through combining understanding of both the natural world and human behaviour  
327 can we successfully tackle the great challenges facing Earth's biodiversity, without jeopardizing the  
328 sustainable livelihood of our own species.

## 329 References

- 330 Adams, J., McShane, T., 1992. *The Myth of wild Africa: conservation without illusions*. University of California  
331 Press, Berkeley, California, USA.
- 332 Amano, T., González-Varo, J.P., Sutherland, W.J., 2016. Languages Are Still a Major Barrier to Global Science.  
333 *PLOS Biology* 14, e2000933.
- 334 Amano, T., Sutherland, W.J., 2013. Four barriers to the global understanding of biodiversity conservation: wealth,  
335 language, geographical location and security. *Proceedings of the Royal Society B: Biological Sciences* 280.
- 336 Baker, K., Eichhorn, M.P., Griffiths, M., 2019. Decolonizing field ecology. *Biotropica* 51, 288-292.
- 337 Balakrishna, P., 1999. Biodiversity conservation and impact assessment. *Current Science* 76, 129-131.
- 338 Balmford, A., Cowling, R.M., 2006. Fusion or Failure? The Future of Conservation Biology. *Conservation*  
339 *Biology* 20, 692-695.
- 340 Baylis, K., Honey-Rosés, J., Börner, J., Corbera, E., Ezzine-de-Blas, D., Ferraro, P.J., Lapeyre, R., Persson, U.M.,  
341 Pfaff, A., Wunder, S., 2016. Mainstreaming Impact Evaluation in Nature Conservation. *Conservation Letters*  
342 9, 58-64.
- 343 Bennett, N.J., Roth, R., Klain, S.C., Chan, K., Christie, P., Clark, D.A., Cullman, G., Curran, D., Durbin, T.J.,  
344 Epstein, G., Greenberg, A., Nelson, M.P., Sandlos, J., Stedman, R., Teel, T.L., Thomas, R., Veríssimo, D.,  
345 Wyborn, C., 2017. Conservation social science: Understanding and integrating human dimensions to improve  
346 conservation. *Biological Conservation* 205, 93-108.
- 347 Brooks, T.M., Mittermeier, R.A., da Fonseca, G.A.B., Gerlach, J., Hoffmann, M., Lamoreux, J.F., Mittermeier,  
348 C.G., Pilgrim, J.D., Rodrigues, A.S.L., 2006. Global Biodiversity Conservation Priorities. *Science* 313, 58-61.
- 349 Carmel, Y., Kent, R., Bar-Massada, A., Blank, L., Liberzon, J., Nezer, O., Sapir, G., Federman, R., 2013. Trends  
350 in Ecological Research during the Last Three Decades – A Systematic Review. *PLoS ONE* 8, e59813.
- 351 Clark, J.A., May, R.M., 2002. Taxonomic Bias in Conservation Research. *Science* 297, 191-192.
- 352 Collen, B., Ram, M., Zamin, T., McRae, L., 2008. The tropical biodiversity data gap: addressing disparity in  
353 global monitoring. *Tropical Conservation Science* 1, 75-88.
- 354 Ferraro, P.J., 2009. Counterfactual thinking and impact evaluation in environmental policy. *New Directions for*  
355 *Evaluation* 2009, 75-84.
- 356 Fisher, B., Balmford, A., Ferraro, P., J., Glew, L., Mascia, M., Naidoo, R., Ricketts, T.H., 2014. Moving Rio  
357 Forward and Avoiding 10 More Years with Little Evidence for Effective Conservation Policy. *Conservation*  
358 *Biology* 28, 880-882.
- 359 Geldmann, J., Barnes, M., Coad, L., Craigie, I.D., Hockings, M., Burgess, N.D., 2013. Effectiveness of terrestrial  
360 protected areas in maintaining biodiversity and reducing habitat loss, p. 61. *Collaboration for Environmental*  
361 *Evidence*, Bangor, United Kingdom.
- 362 Godet, L., Devictor, V., 2018. What Conservation Does. *Trends in Ecology & Evolution* 33, 720-730.
- 363 Greenwald, N., Dellasala, D.A., Terborgh, J.W., 2013. Nothing New in Kareiva and Marvier. *BioScience* 63, 241-  
364 241.
- 365 Guerrero, A.M., Bennett, N.J., Wilson, K.A., Carter, N., Gill, D., Mills, M., Ives, C.D., Selinske, M.J., Larrosa,  
366 C., Bekessy, S., Januchowski-Hartley, F.A., Travers, H., Wyborn, C.A., Nuno, A., 2018. Achieving the  
367 promise of integration in social-ecological research: a review and prospectus. *Ecology and Society* 23.
- 368 Kareiva, P., 2014. New Conservation: Setting the Record Straight and Finding Common Ground. *Conservation*  
369 *Biology* 28, 634-636.
- 370 Kareiva, P., Groves, C., Marvier, M., 2014. The evolving linkage between conservation science and practice at  
371 The Nature Conservancy. *Journal of Applied Ecology* 51, 1137-1147.
- 372 Kareiva, P., Marvier, M., 2012. What is conservation science? *BioScience* 62, 962-969.

- 373 Legg, C.J., Nagy, L., 2006. Why most conservation monitoring is, but need not be, a waste of time. *Journal of*  
374 *Environmental Management* 78, 194-199.
- 375 Mace, G.M., 2014. Whose conservation? *Science* 345, 1558-1560.
- 376 Mammides, C., Goodale, U.M., Corlett, R.T., Chen, J., Bawa, K.S., Hariya, H., Jarrad, F., Primack, R.B., Ewing,  
377 H., Xia, X., Goodale, E., 2016. Increasing geographic diversity in the international conservation literature: A  
378 stalled process? *Biological Conservation* 198, 78-83.
- 379 Martin, J.-L., Maris, V., Simberloff, D.S., 2016. The need to respect nature and its limits challenges society and  
380 conservation science. *Proceedings of the National Academy of Sciences* 113, 6105-6112.
- 381 Martin, L.J., Blossey, B., Ellis, E., 2012a. Mapping where ecologists work: biases in the global distribution of  
382 terrestrial ecological observations. *Frontiers in Ecology and the Environment* 10, 195-201.
- 383 Martin, T.G., Burgman, M.A., Fidler, F., Kuhnert, P.M., Low-Choy, S., McBride, M., Mengersen, K., 2012b.  
384 *Eliciting Expert Knowledge in Conservation Science*
- 385 *Obtención de Conocimiento de Expertos en Ciencia de la Conservación. Conservation Biology* 26, 29-38.
- 386 McHugh, M.L., 2012. Interrater reliability: the kappa statistic. *Biochemia medica* 22, 276-282.
- 387 Meijaard, E., Cardillo, M., Meijaard, E.M., Possingham, H.P., 2015. Geographic bias in citation rates of  
388 conservation research. *Conservation Biology* 29, 920-925.
- 389 Meine, C., Soulé, M., Noss, R.F., 2006. "A Mission-Driven Discipline": the Growth of Conservation Biology.  
390 *Conservation Biology* 20, 631-651.
- 391 Miteva, D.A., Pattanayak, S.K., Ferraro, P.J., 2012. Evaluation of biodiversity policy instruments: what works  
392 and what doesn't? *Oxford Review of Economic Policy* 28, 69-92.
- 393 Myers, N., Mittermeier, R.A., Mittermeier, C.G., da Fonseca, G.A.B., Kent, J., 2000. Biodiversity hotspots for  
394 conservation priorities. *Nature* 403, 853-858.
- 395 NCBI Resource Coordinators, 2017. Database resources of the National Center for Biotechnology Information.  
396 *Nucleic Acids Research* 46, D8-D13.
- 397 Noss, R., Nash, R., Paquet, P., Soule, M., 2013. Humanity's Domination of Nature is Part of the Problem: A  
398 Response to Kareiva and Marvier. *BioScience* 63, 241-242.
- 399 Organisation for Economic Co-operation and Development, 1993. OECD core set of indicators for environmental  
400 performance reviews. OECD, Paris, France.
- 401 Poisot, T., Bruneau, A., Gonzalez, A., Gravel, D., Peres-Neto, P., 2019. Ecological Data Should Not Be So Hard  
402 to Find and Reuse. *Trends in Ecology & Evolution* 34, 494-496.
- 403 Pullin, A.S., Knight, T.M., 2001. Effectiveness in conservation practice: Pointers from medicine and public health.  
404 *Conservation Biology* 15, 50-54.
- 405 R Development Core Team, 2019. R: A language and environment for statistical computing. R Foundation for  
406 Statistical Computing.
- 407 Ríos-Saldaña, C.A., Delibes-Mateos, M., Ferreira, C.C., 2018. Are fieldwork studies being relegated to second  
408 place in conservation science? *Global Ecology and Conservation* 14, e00389.
- 409 Sandbrook, C., Fisher, J.A., Holmes, G., Luque-Lora, R., Keane, A., 2019. The global conservation movement is  
410 diverse but not divided. *Nature Sustainability* 2, 316-323.
- 411 Schleicher, J., 2018. The environmental and social impacts of protected areas and conservation concessions in  
412 South America. *Current Opinion in Environmental Sustainability* 32, 1-8.
- 413 Soule, M., 2013. The "New Conservation". *Conservation Biology* 27, 895-897.
- 414 Soulé, M.E., 1985. What Is Conservation Biology? *BioScience* 35, 727-734.
- 415 Sutherland, W.J., Pullin, A.S., Dolman, P.M., Knight, T.M., 2004. The need for evidence-based conservation.  
416 *Trends in Ecology & Evolution* 19, 305-308.
- 417 Tallis, H., Lubchenco, J., 2014. Working together: a call for inclusive conservation. *Nature* 515, 27-28.
- 418 Teel, T.L., Anderson, C.B., Burgman, M.A., Cinner, J., Clark, D., Estévez, R.A., Jones, J.P.G., McClanahan, T.R.,  
419 Reed, M.S., Sandbrook, C., St. John, F.A.V., 2018. Publishing social science research in *Conservation Biology*  
420 to move beyond biology. *Conservation Biology* 32, 6-8.
- 421 Tewksbury, J.J., Anderson, J.G.T., Bakker, J.D., Billo, T.J., Dunwiddie, P.W., Groom, M.J., Hampton, S.E.,  
422 Herman, S.G., Levey, D.J., Machnicki, N.J., del Rio, C.M., Power, M.E., Rowell, K., Salomon, A.K., Stacey,  
423 L., Trombulak, S.C., Wheeler, T.A., 2014. Natural History's Place in Science and Society. *BioScience* 64,  
424 300-310.
- 425 Wilson, E.O., 2017. Biodiversity research requires more boots on the ground. *Nature Ecology & Evolution* 1,  
426 1590-1591.
- 427
